# Supplementary material for: Cantharidin impedes the activity of protein serine/threonine phosphatase in Plutella xylostella
Source: Royal Society of Chemistry journal article supplement (doi:10.1039/c3mb70410f), 2013-10-30
Supplement: c3mb70410f.pdf [file c3mb70410f.pdf]

**Table S1** Primers for cloning *P. xylostella* protein serine/threonine phosphatases genes

| Gene     | Primer name                      | Sequence(5'-3')                            |
|----------|----------------------------------|--------------------------------------------|
| PxPP1    | P1-3'RACE-1                      | CCTCGGAGATTATGTGGACC                       |
|          | P1-3'RACE-2                      | GCCTACCCGTGGCGGCGATA                       |
|          | P1-5'RACE-1                      | CTCTATTTTCGGTCAACTGTA                      |
|          | P1-5'RACE-2                      | TACCAGGCTTTTCGCCCCGT                       |
|          | P1-ORF-F                         | CATATGGCAGACAGAGACACAGATG                  |
|          | P1-ORF-R                         | CTCGAGTTACGGCTTCAGGATCTGG                  |
| PxPP2A   | P2-CR-F                          | GCCCGAGACCAACTACCTGttyatggngga             |
|          | P2-CR-R                          | CGTTGCCGCACCGGtarcartartt                  |
|          | P2-3'RACE-1                      | GCTGTGGAGCGACCCTGATGATAG                   |
|          | P2-3'RACE-2                      | TACAACTGGTGCCACGACAGAAAT                   |
|          | P2-5'RACE-1                      | CGGTTCTGTAGAGCCTCAGCAAGTTG                 |
|          | P2-5'RACE-2                      | TATGCCCAAGATGCTGCTCACGGACG                 |
|          | P2-ORF-F                         | CATATGGAAGACAAGGCGTCGCTAAAGG               |
|          | P2-ORF-R                         | AAGCTTCTACATGAAGTAATCCGGCGTCCGC            |
| PxPP4    | P4-CR-F                          | CGAGGTGAAGGCCCTGtgygcnaargc                |
|          | P4-CR-R                          | GGGGCGGCCTCGaadatngtraa                    |
|          | P4-3'RACE-1                      | GTGGAGACTTTCTGTTGCTACTGGC                  |
|          | P4-3'RACE-2                      | TCTTTGACTACCTCTCGCTGTCCGGCT                |
|          | P4-5'RACE-1                      | ACTCGTCGTAGAACCCGTAT                       |
|          | P4-5'RACE-2                      | AACGAATAGTTGGTCTCGGG                       |
|          | P4-ORF-F                         | CGGAATTCATGTCAGATACGAGTGATTTGGAC           |
|          | P4-ORF-R                         | CCCAAGCTTTTATAAGAAGTAGTCCGCTTGAGG          |
| PxPP5    | P5-CR-F                          | CACATGTCCCTGGGCAAGtwyaaarytngc             |
|          | P5-CR-R                          | GGCGGAGAACACGGTGatrcayttnc                 |
|          | P5-3'RACE-1                      | TCAGTGTGGAGTGTATCTTTGTGC                   |
|          | P5-3'RACE-2                      | CCAACTTCCTCGCCCGCAACCGCC                   |
|          | P5-5'RACE-1                      | CCGCAGACTGTGAACTTGGC                       |
|          | P5-5'RACE-2                      | TTGGACTTGCCAGGGGGACT                       |
|          | P5-ORF-F                         | CATATGcaccaccaccaccacGCAAGTAACGATGAAATTACC |
| P5-ORF-R | AAGCTTCTACTGACAGAGCATGCTGAGGAATG |                                            |
| PxPP6    | P6-ORF-F                         | CATATGACCGACGTAGATAAATGGA                  |
|          | P6-ORF-R                         | AAGCTTTTAAAGAAAATAAGGGGTTGTGT              |

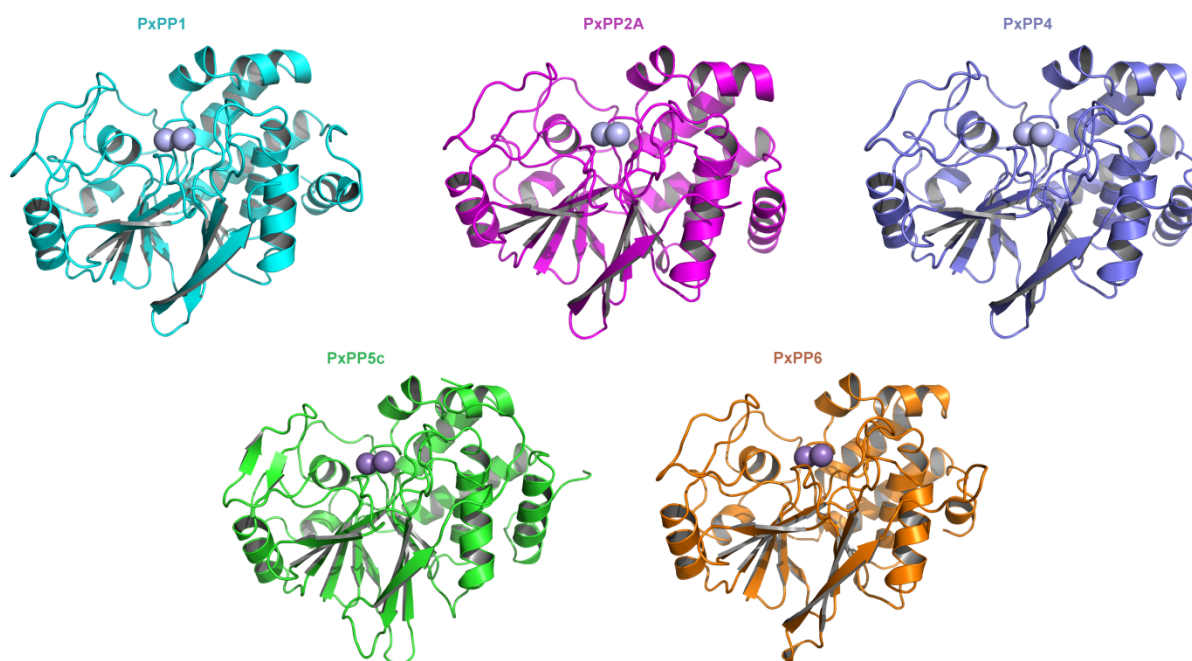

**Fig. S1** The cartoon representation of the 3D models of PP1 (Cyan), PP2A (Magenta), PP4 (Slate), PP5 (Green), and PP6 (Orange) from *P. xylostella*. Two manganese ions are shown as slate balls.

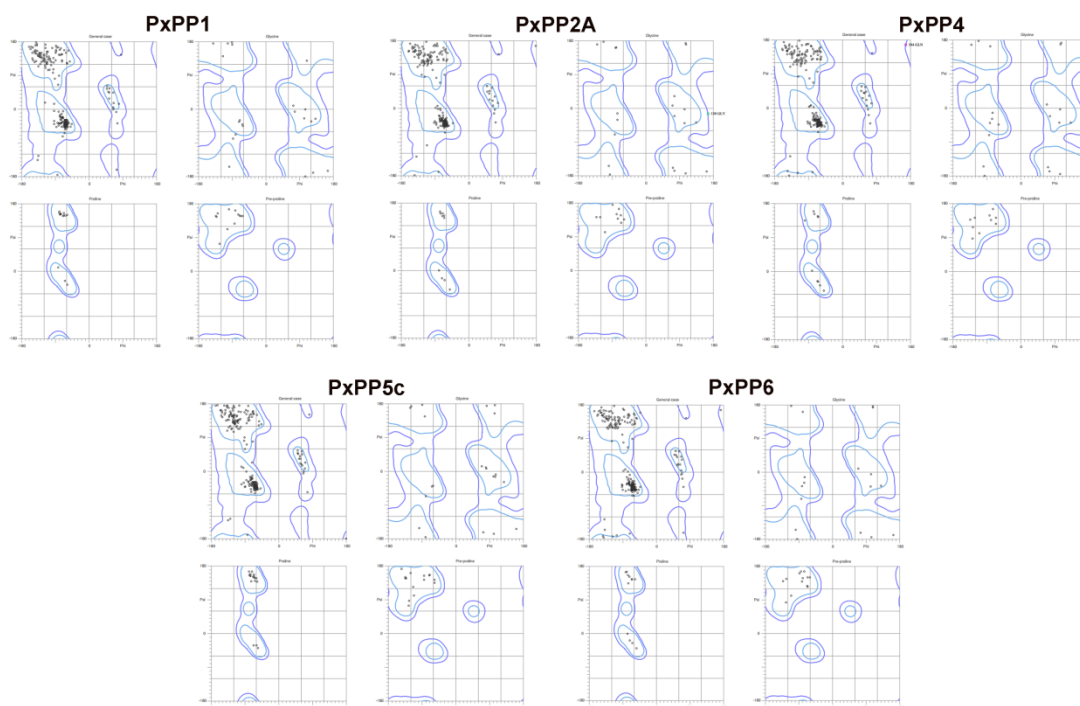

**Fig. S2** Ramachandran Plots of *P<sub>x</sub>PP1*, *P<sub>x</sub>PP2A*, *P<sub>x</sub>PP4*, *P<sub>x</sub>PP5*, and *P<sub>x</sub>PP6* 3D models.

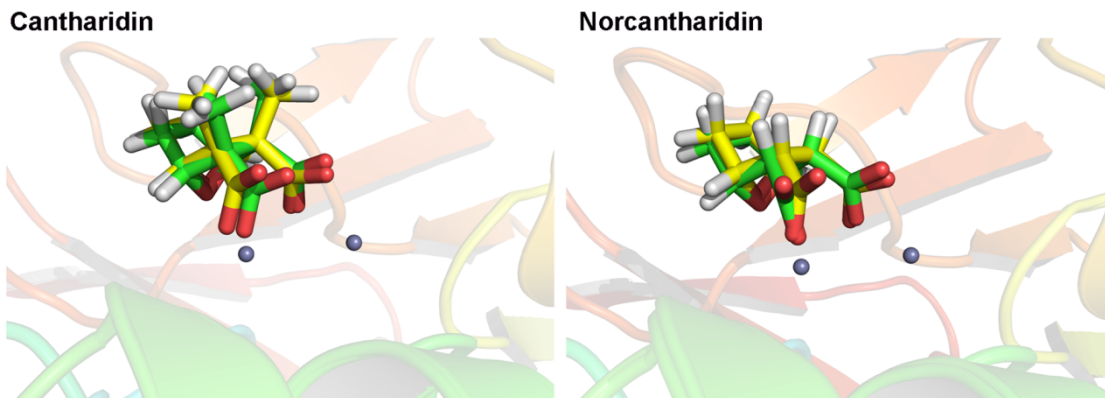

**Fig. S3** The superimposition of the conformations of cantharidin and norcantharidin in *PxPP5* 3D model with those in the 3H63 and 3H61, respectively.

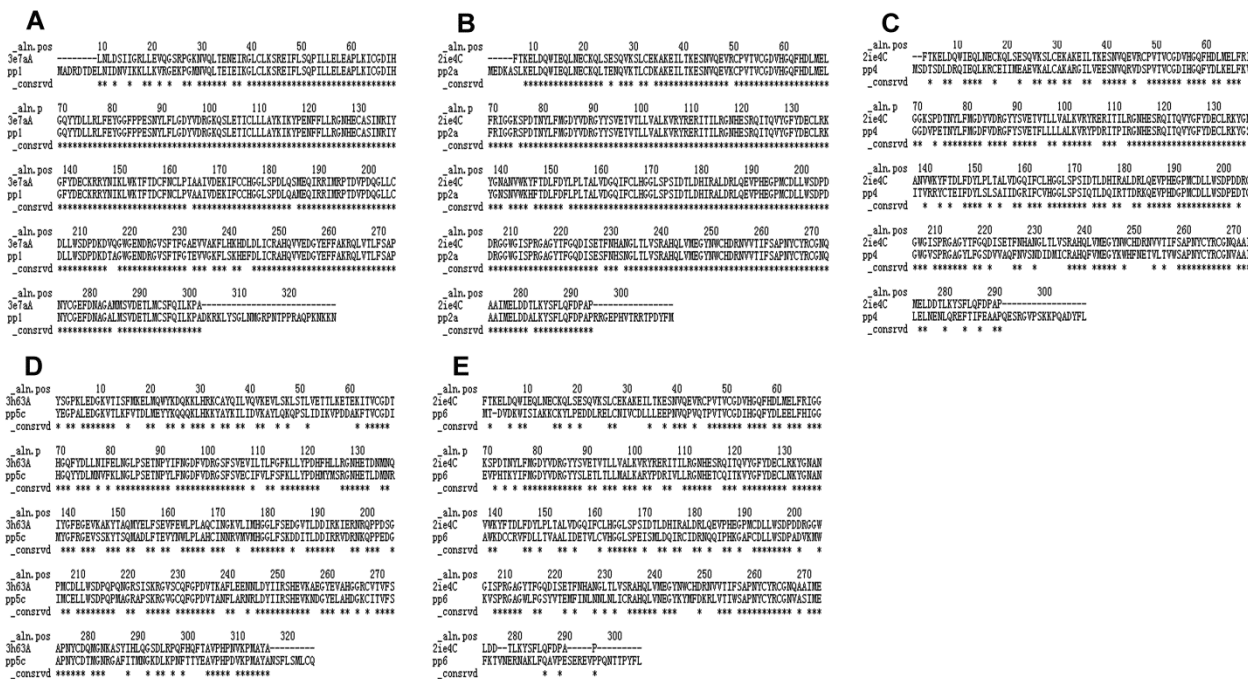

**Fig. S4** Sequence alignment of *PxPSPs* and templates. (A) *PxPP1* and 3E7A, (B) *PxPP2A* and 2IE4, (C) *PxPP4* and 2IE4, (D) *PxPP5c* and 3H63, (E) *PxPP6* and 2IE4.
